# Supplementary material for: Controlled Morphological Bending of 3D-FEBID Structures via Electron Beam Curing
Source: Nanomaterials (Basel). 2022 Nov 29;12(23):4246. doi: 10.3390/nano12234246 (PMC9737864; doi:10.3390/nano12234246)
Supplement: Supplementary file 1 [file nanomaterials-12-04246-s001.zip › nanomaterials-2046028-supplementary.pdf]

# Supporting Information

## Controlled Morphological Bending of 3D-FEBID Structures via Electron Beam Curing

Anna Weitzer <sup>1</sup>, Robert Winkler <sup>2</sup>, David Kuhness <sup>2</sup>, Gerald Kothleitner <sup>1,3</sup> and Harald Plank <sup>1,2,3,\*</sup>

<sup>1</sup> Institute of Electron Microscopy and Nanoanalysis, Graz University of Technology,  
8010 Graz, Austria

<sup>2</sup> Christian Doppler Laboratory for Direct-Write Fabrication of 3D Nano-Probes, Institute  
of Electron Microscopy and Nanoanalysis, Graz University of Technology,  
8010 Graz, Austria

<sup>3</sup> Graz Centre for Electron Microscopy, Steyrergasse 17, 8010 Graz, Austria

\* Correspondence: harald.plank@felmi-zfe.at; Tel.: +43-316-873-8821

## Supplement S1: Point Pitch and Dwell Time variation

To test the influence of the step size within the electron beam curing (EBC) irradiation grid (point pitch **PoP**) and the dwell time splitting for each patterning pass (dwell time **DT**), an experimental series was conducted.  $W \times H \times T = (1000 \times 2000 \times 100)$  nm vertical FEBID walls were used as base elements, which were EBC treated via horizontal patterning strips of  $W \times H = (1200 \times 200)$  nm size under a sample tilt angle of  $52^\circ$ . Fig. S1 shows the results for bending angles  $\beta$  in dependency on  $PoP$  for two different dwell times  $DT = 1$  ms (green) and  $DT = 100$   $\mu$ s (blue). All curing processes were performed at 2 keV primary electron energy, 48 pA primary electron current and irradiation doses of  $\approx 8$  C/cm<sup>2</sup>. The average difference in bending angles between  $DT = 1$  ms and  $DT = 100$   $\mu$ s is  $\Delta\beta \approx 0.1^\circ$  and can therefore be neglected. For further EBC experiments, 1 ms was used as the standard dwell time. For point pitches between 5 nm and 50 nm, a minor increase in bending angles was observed, although with a limited impact of  $\Delta\beta \approx 1^\circ$ . As the point pitch only seems to play an insignificant role concerning the efficiency of EBC, 5 nm were chosen as the standard parameter as, from an optical point of view, this value provided the smoothest fold with the least indentations at curing sites.

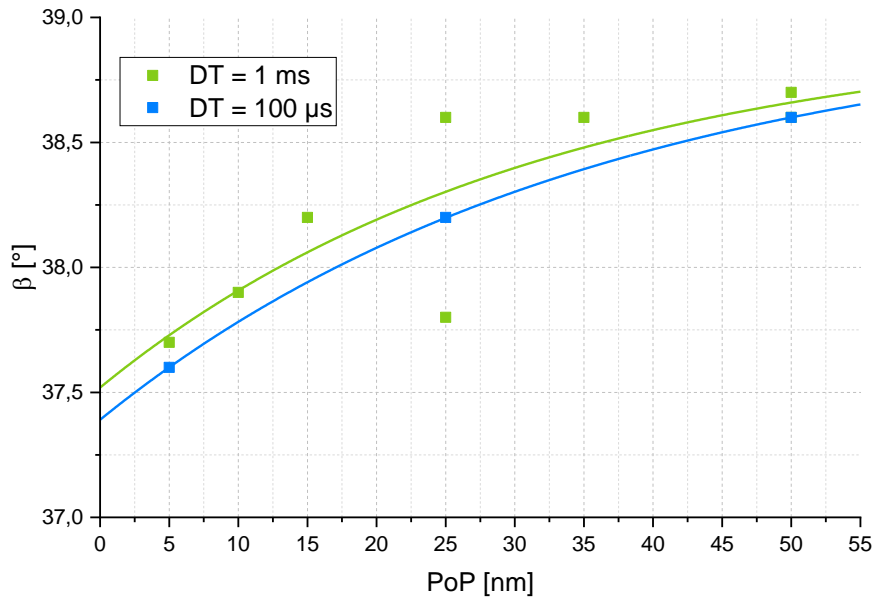

**Figure S1:** Impact of point pitch PoP and dwell time DT on EBC efficiency. Bending angles  $\beta$  are depicted depending on PoP for two different dwell times of  $DT = 1$  ms (green) and  $DT = 100$   $\mu$ s (blue).

## Supplement S2: Width Variation

To show the applicability of this targeted bending method via EBC to elements of different dimensions, a series of walls with varying widths was deposited via FEBID and electron beam cured at 2 keV and 48 pA with irradiation doses of  $\approx 8 \text{ C/cm}^2$  as illustrated in Fig. S2. The bending angles showed deviations of up to  $5^\circ$ , but a significant trend could not yet be discerned from the experimental data. We do, however, expect a more detailed insight into possible differences in the effectivity of the bending behaviour depending on the element width from ongoing investigations.

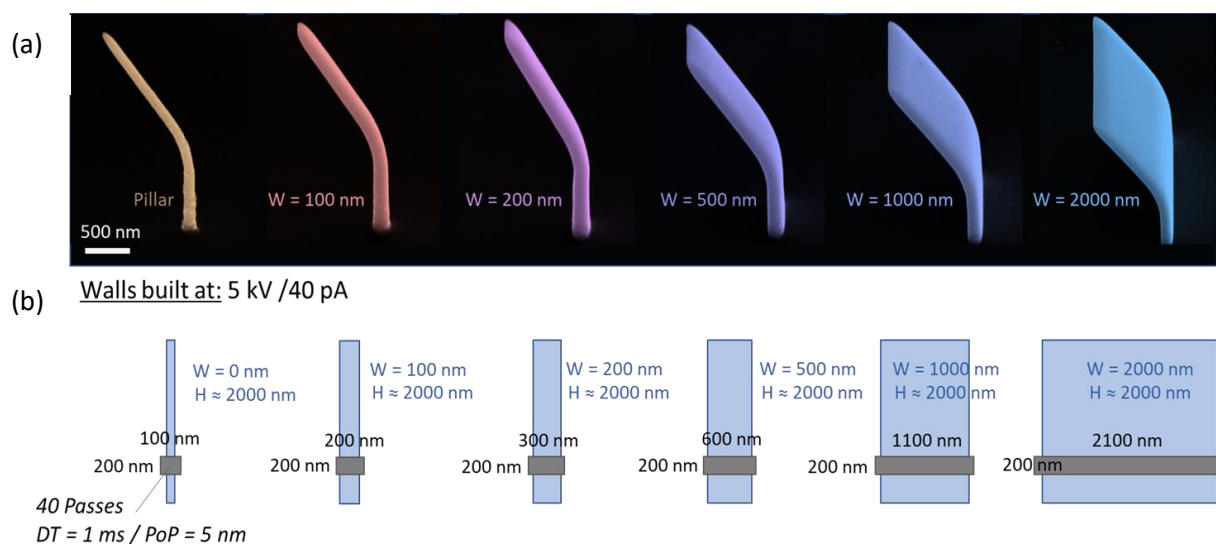

**Figure S2:** Electron beam cured walls of different widths. (a) SEM images of bent walls from point deposition (left) to width  $W = 2 \mu\text{m}$  (right) in a side view and (b) schematics of the used EBC patterns, with base element walls in blue and electron beam cured areas in grey.
